# Supplementary material for: Experimental Sensing and Density Functional Theory Study of H2S and SOF2 Adsorption on Au‐Modified Graphene
Source: Wiley journal article supplement (doi:10.1002/advs.201500101), 2015-09-10
Supplement: advs201500101-sup-0001-S1.pdf [file advs201500101-sup-0001-S1.pdf]

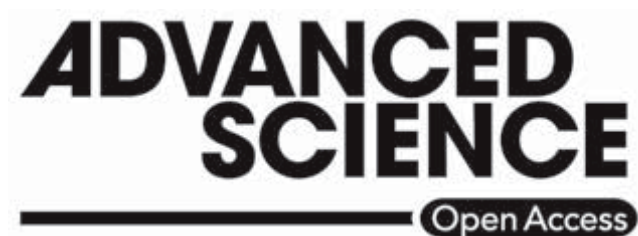

## Supporting Information

for *Adv. Sci.*, DOI: 10.1002/advs.201500101

Experimental Sensing and Density Functional Theory Study of  
H<sub>2</sub>S and SOF<sub>2</sub> Adsorption on Au-Modified Graphene

*Xiaoxing Zhang,\* Lei Yu, Xiaoqing Wu, and Weihua Hu*

## SUPPORTING INFORMATION

In order to find out the most stable and possible position that Au atom forms on the graphene surface, the formation energy, which is short for  $E_{form}(C \rightarrow Au)$ , of every modification model was calculated in DFT study. The  $E_{form}(C \rightarrow Au)$  was calculated through the principle formula:

$$E_{form}(C \rightarrow Au) = E_{tot}(Au - functionalized) - E_{tot}(pristine) + \mu_C - \mu_{Au} \quad (S.1)$$

where  $E_{tot}(Au-functionalized)$  represents for the total energy of Au modified graphene;  $E_{tot}(pristine)$  represents for the total energy of pure graphene;  $\mu_C$  and  $\mu_{Au}$  are the energy of single atom in individual crystal.

Table S1 gives out the formation energies of H, B and T site models. The T site model is proved to be with the lowest energy, indicating that the T site model is the most possible position for Au.

| Table S1 Formation energy of Au-modified graphene |        |        |        |
|---------------------------------------------------|--------|--------|--------|
| Position                                          | H site | B site | T site |
| $E_{form}(C \rightarrow Au)$ (eV)                 | 1.71   | 1.42   | 0.89   |
